# Supplementary material for: All-inorganic quantum-dot light-emitting diodes based on perovskite emitters with low turn-on voltage and high humidity stability
Source: Royal Society of Chemistry journal article supplement (doi:10.1039/c6tc05578h), 2017-01-01
Supplement: c6tc05578h3.pdf [file c6tc05578h3.pdf]

# All-inorganic QLEDs Based on Perovskite Emitters with High Humidity/water Stability

*Qingsong Shan<sup>†</sup>, Jianhai Li<sup>‡</sup>, Jizhong Song\*, Yousheng Zou, Leimeng Xu, Jie Xue, Yuhui Dong, Chengxue Huo, Jiawei Chen, Boning Han, and Haibo Zeng\**

MIIT Key Laboratory of Advanced Display Materials and Devices, Herbert Gleiter Institute of Nanoscience, Institute of Optoelectronics & Nanomaterials, College of Materials Science and Engineering, Nanjing University of Science and Technology, Nanjing 210094, China

<sup>†</sup>These authors contribute to this work equally

\*Correspondence and requests for material to H. B. Zeng (zeng.haibo@njust.edu.cn)

or J. Z. Song (songjizhong@njust.edu.cn)

**KEYWORDS:** perovskites, CsPbBr<sub>3</sub> QDs, light-emitting diodes, all-inorganic, humidity stability

**Figure S1**

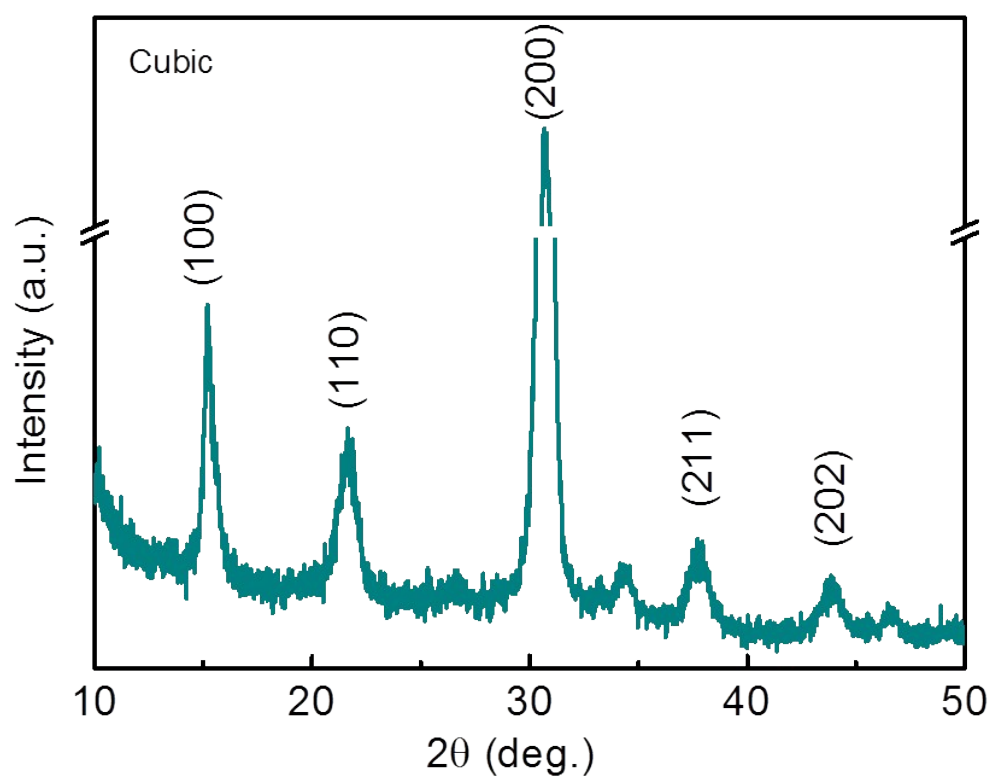

**Figure S1.** The XRD pattern of perovskite CsPbBr<sub>3</sub> QDs film.

**Figure S2**

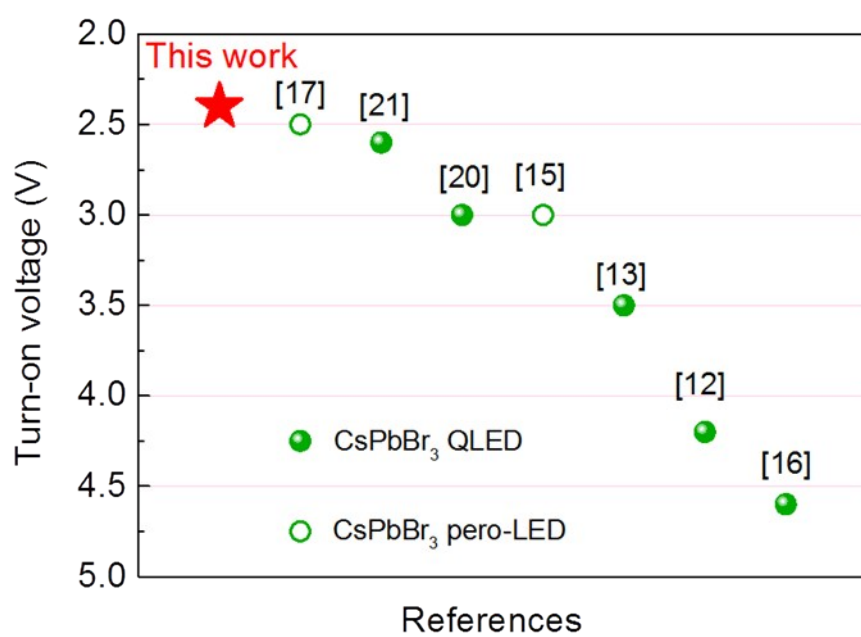

**Figure S2.** Comparison of turn-on voltages of the reported CsPbBr<sub>3</sub> QLEDs including this work.

**Figure S3**

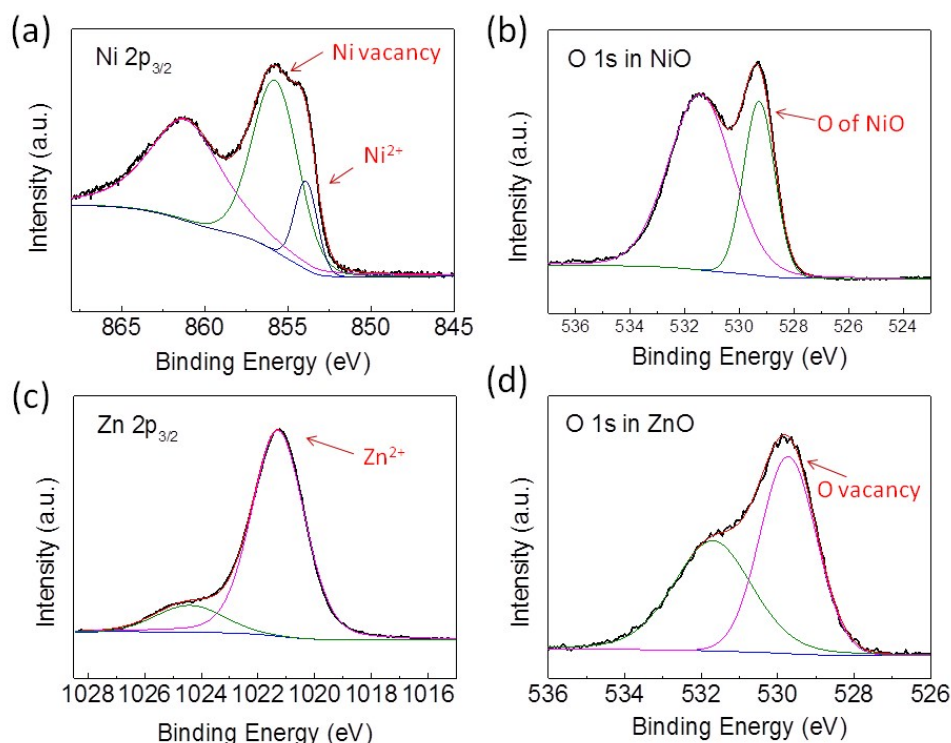

**Figure S3.** XPS spectra of the Ni 2p<sub>3/2</sub> peaks a) and O 1s peaks b) of the NiO films and Zn 2p<sub>3/2</sub> c) and O 1s d) of ZnO films.

Figure S3a presents Ni 2p<sub>3/2</sub> XPS spectra of the NiO<sub>x</sub> film, the peak centred at 853.9 eV belongs to Ni<sup>2+</sup> and the peak centred at 855.8 eV can be attributed to Ni<sup>3+</sup> which was induced by the interstitial oxygen defects or Ni vacancy. The broad peak located at 861.2 eV can be ascribed to a shake-up process in the NiO structure.<sup>1</sup> The O 1s XPS spectra of NiO<sub>x</sub> are shown in Figure S3b, the peak centred at 531.5 eV probably caused by nickel hydroxides and oxyhydroxides,<sup>2</sup> for the NiO film with defects will chemical adsorb water and form surface hydroxide during exposed to atmospheric conditions. The peak centred at 529.3 eV originates from the lattice O atoms of NiO. Figure S3c presents Zn 2p<sub>3/2</sub> XPS spectra of the ZnO film. The peak centred at 1021.2 eV pertains to Zn 2p<sub>3/2</sub>, while the shoulder peak located at 1024.4 eV may be related to interstitial Zn atoms<sup>3-4</sup>. The XPS spectra of O 1s peaks are shown in Figure S3d, the peak located at 529.7 eV was ascribed to Zn–O bonds in ZnO crystal. The peak centred at 531.7 eV is related to oxygen-deficient regions within the ZnO film.<sup>5</sup>

**Figure S4**

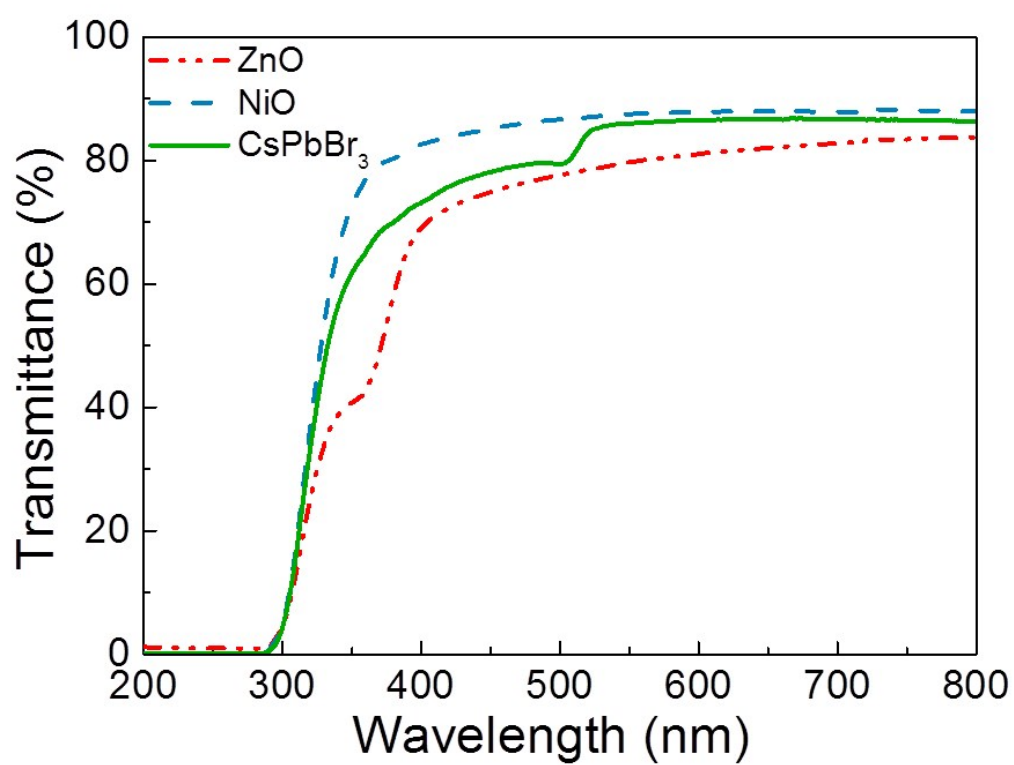

**Figure S4.** The optical transmittance spectra of CsPbBr<sub>3</sub> QDs, NiO and ZnO films.

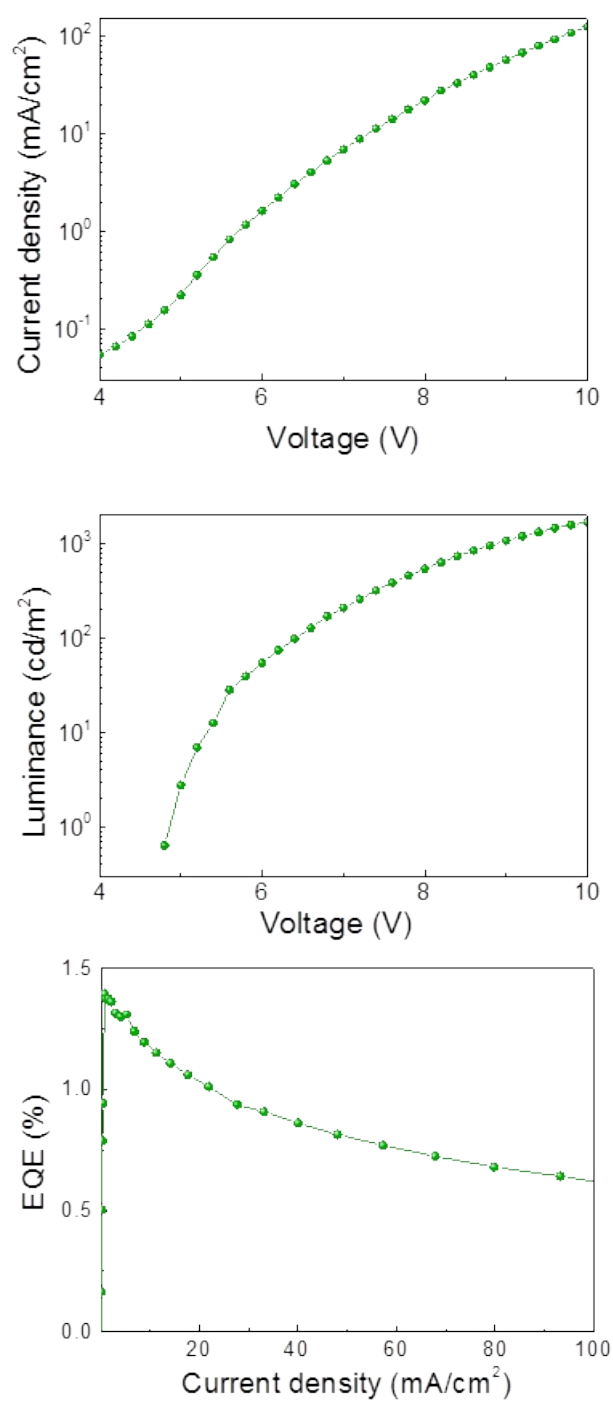

**Figure S5.** The performance of QLEDs based on OCTLs

**Video S1** showing the all-inorganic QLEDs working under water over time (avi)

**Video S2** showing the QLEDs with organic CTLs working under water over time (avi)

## REFERENCES

(1) Wang, K. C.; Shen, P. S.; Li, M. H.; Chen, S.; Lin, M. W.; Chen, P.; Guo, T. F., Low-temperature sputtered nickel oxide compact thin film as effective electron blocking layer for mesoscopic NiO/CH<sub>3</sub>NH<sub>3</sub>PbI<sub>3</sub> perovskite heterojunction solar cells. *ACS Appl. Mater. Interfaces* **2014**, *6* (15), 11851-11858.

(2) Manders, J. R.; Tsang, S. W.; Hartel, M. J.; Lai, T. H.; Chen, S.; Amb, C. M.; Reynolds, J. R.; So, F., Solution-Processed Nickel Oxide Hole Transport Layers in High Efficiency Polymer Photovoltaic Cells. *Adv. Funct. Mater.* **2013**, *23* (23), 2993-3001.

(3) Pei, Z.; Ding, L.; Hu, J.; Weng, S.; Zheng, Z.; Huang, M.; Liu, P., Defect and its dominance in ZnO films: A new insight into the role of defect over photocatalytic activity. *Appl. Catal. B-Environ.* **2013**, *142-143* (2), 736-743.

(4) Islam, M. N.; Ghosh, T. B.; Chopra, K. L.; Acharya, H. N., XPS and X-ray diffraction studies of aluminum-doped zinc oxide transparent conducting films. *Thin Solid Films* **1996**, *280* (1-2), 20-25.

(5) Sun, Y.; Seo, J. H.; Takacs, C. J.; Seifert, J.; Heeger, A. J., Inverted polymer solar cells integrated with a low-temperature-annealed sol-gel-derived ZnO film as an electron transport layer. *Adv. Mater.* **2011** *23*(14), 1679-1683.
